# Supplementary material for: Patient Education Improves Pain and Health-Related Quality of Life in Patients with Established Spinal Osteoporosis in Primary Care—A Pilot Study of Short- and Long-Term Effects
Source: MDPI journal article supplement (doi:10.3390/ijerph20064933), 2023-03-10
Supplement: s1 [file s1]

**Table S1.** Questionnaires and clinical testing outcomes and change between baseline and post-observation.

|                                      | Baseline              | Post-Observation      |              |
|--------------------------------------|-----------------------|-----------------------|--------------|
|                                      | Md [X] 25-75%         | Md [X] 25-75%         | p-value      |
| <b>RAND-36</b>                       |                       |                       |              |
| Physical function PF                 | 70 [60] 35-85         | 70 [59] 35-80         | 0.435        |
| Role Physical RP                     | 25 [39] 0-75          | 50 [50] 0-100         | 0.485        |
| Bodily Pain BP                       | 45 [49] 45-63         | 45 [51] 45-68         | 0.609        |
| General Health GH                    | 55 [52] 28-73         | 60 [56] 35-78         | 0.158        |
| Vitality VT                          | 55 [55] 33-73         | 65 [56] 38-78         | 0.677        |
| Social Function SF                   | 75 [75] 50-100        | 75 [72] 50-100        | 0.108        |
| Role Emotional RE                    | 100 [65] 33-100       | 100 [73] 33-100       | 0.491        |
| Mental Health MH                     | 76 [73] 66-88         | 84 [75] 58-92         | 0.366        |
| <b>Qualeffo-41</b>                   |                       |                       |              |
| Pain                                 | 55 [51] 35-65         | 40 [49] 33-70         | 0.327        |
| Activities of Daily Life             | 13 [19] 6-25          | 19 [21] 13-28         | 0.323        |
| Jobs Around the House                | 20 [27] 10-45         | 25 [28] 7,5-40        | 0.980        |
| Mobility                             | 22 [25] 9-46          | 19 [25] 11-39         | 0.878        |
| Social Function                      | 40 [41] 22-61         | 33 [40] 23-64         | 0.629        |
| General Health Perception            | 58 [56] 38-71         | 58 [54] 33-75         | 0.530        |
| Mental Function                      | 36 [39] 31-50         | 36 [38] 26-50         | 0.923        |
| Total score                          | 32 [36] 25-48         | 28 [36] 25-48         | 0.602        |
| <b>EQ-5D</b>                         |                       |                       |              |
| EQ-5D Index                          | 0.73 [0.63] 0.62-0.80 | 0.73 [0.66] 0.62-0.80 | 0.646        |
| <b>Pain</b>                          |                       |                       |              |
| Current pain, NRS                    | 3.5 [3.2] 0.3-5.3     | 1.0 [1.7] 0.0-3.0     | <b>0.019</b> |
| Pain last week, NRS                  | 5.0 [5.2] 4.0-6.9     | 5.0 [5.0] 4.0-6.0     | 0.794        |
| Worst pain, NRS                      | 7.8 [7.3] 6.3-8.3     | 8.0 [7.2] 5.0-9.0     | 0.805        |
| <b>Fall</b>                          |                       |                       |              |
| FES-I                                | 21 [26] 19-34         | 21 [26] 19-31         | 0.627        |
| <b>Physical activity</b>             |                       |                       |              |
| Physical exercise weekly (min)       | 30 [42] 8-75          | 30 [41] 0-75          | 0.743        |
| Everyday activity weekly (min)       | 225 [198] 98-300      | 225 [215] 150-300     | 0.196        |
| Total Physical activity weekly (min) | 255 [235] 116-323     | 300 [256] 150-345     | 0.348        |
| Daily sitting/resting (hours)        | 5 [5] 2-7             | 5 [5] 2-7             | 0.85         |

**Clinical tests**

|                            |                       |                     |              |
|----------------------------|-----------------------|---------------------|--------------|
| Distance C7-wall (cm)      | 6.5 [7.9] 5-11        | 6 [7] 5-9           | <b>0.025</b> |
| Hand force right           | 20 [20] 17-24         | 20 [21] 17-26       | 0.338        |
| Hand force left            | 18 [19] 14-23         | 17 [19] 15-23       | 0.691        |
| Chair-stand test           | 9 [9] 7-11            | 11 [12] 10-14       | <b>0.002</b> |
| Right leg, eyes open (s)   | 30 [23] 15-30         | 20 [19] 8-30        | 0.32         |
| Left leg, eyes open (s)    | 27 [21] 12-30         | 29 [21] 9-30        | 0.674        |
| Right leg, eyes closed (s) | 3 [4] 2-5             | 3 [3] 2-4           | 0.931        |
| Left leg, eyes closed (s)  | 2 [3] 1-4             | 3 [4] 1-5           | 0.114        |
| Walking forwards (steps)   | 15 [12] 10-15         | 15 [12] 10-15       | 0.953        |
| Walking backwards (steps)  | 15 [11] 5-15          | 15 [11] 2-15        | 0.465        |
| Weight (kg)                | 63.8 [66.7] 55.8-74.4 | 63 [66.7] 55.0-76.0 | 0.972        |
| Height (cm)                | 160 [161] 154-169     | 160 [161] 153-169   | 0.275        |

---

Abbreviations: Md, Median; [X], Mean; Bold text:  $p < 0.05$ . All  $n=21$
